# Supplementary material for: Two isostructural Zn/Co-MOFs with penetrating structures: multifunctional properties of both luminescence sensing and conversion of CO2 into cyclic carbonates
Source: Royal Society of Chemistry journal article supplement (doi:10.1039/d3dt03466f), 2023-12-28
Supplement: d3dt03466f1.pdf [file d3dt03466f1.pdf]

*Supporting Information for*

**Two isostructural Zn/Co-MOFs with penetrating structures:  
multifunctional properties of both luminescence sensing and  
conversion of CO<sub>2</sub> into cyclic carbonates**

Nana Liu<sup>a,b#</sup>, Tingting Liu<sup>a#</sup>, Guangning Liu<sup>b</sup>, Xiuna Mi<sup>a</sup>, Yunwu Li<sup>a</sup>, Lu Yang<sup>c</sup>, Zhen  
Zhou<sup>c</sup>, Suna Wang<sup>a,b\*</sup>

[a] Shandong Provincial Key Laboratory of Chemical Energy Storage and Novel Cell  
Technology, School of Chemistry and Chemical Engineering, Liaocheng University,  
Liaocheng, 252059, P. R. China

[b] School of Chemistry and Chemical Engineering, University of Jinan, Jinan,  
Shandong, 250022, P. R. China

[c] School of Chemistry and Chemical Engineering, Shandong University of  
Technology, Zibo, 255000, P. R. China

Email: [wangsuna@lcu.edu.cn](mailto:wangsuna@lcu.edu.cn); [zhouzhen@sdut.edu.cn](mailto:zhouzhen@sdut.edu.cn)

# These two authors contribute equally.

## Table of Content

**Table S1.** Refined crystal parameters of **Zn-MOF-1** and **Co-MOF-2**.

**Table S2.** Selected bond lengths [ $\text{\AA}$ ] and angles [ $^\circ$ ] for **Zn-MOF-1** and **Co-MOF-2**.

**Table S3.** Time tracing of **Zn-MOF-1** catalyzed  $\text{CO}_2$  cycloaddition of epoxide.

**Table S4.** Pressure tracing of **Zn-MOF-1** catalyzed  $\text{CO}_2$  cycloaddition of epoxide.

**Table S5.**  $\text{CO}_2$  cycloaddition of different epoxides catalyzed by **Zn-MOF-1** and **Co-MOF-2**.

**Table S6.** Investigation of substrate scope in the  $\text{CO}_2$ -to-epoxide cycloaddition reaction catalyzed by  $\text{Zn}(\text{NO}_3)_2 \cdot 6\text{H}_2\text{O}$  and  $\text{Co}(\text{NO}_3)_2 \cdot 6\text{H}_2\text{O}$  in the presence of TBAB as the cocatalyst.

**Fig. S1** (a) and (b) PXRD spectra of **Zn-MOF-1** and **Co-MOF-2** soaked in EtOH and  $\text{H}_2\text{O}$ .

**Fig. S2** (a) and (b) PXRD spectra of **Zn-MOF-1** and **Co-MOF-2**: Newly-synthesized samples, exposed in air for five days, immersed in water for three days.

**Fig. S3** (a) and (b) TG of **Zn-MOF-1** and **Co-MOF-2**.

**Fig. S4** (a) and (b) EDS mapping of **Zn-MOF-1** and **Co-MOF-2**.

**Fig. S5** (a) and (b) IR of **Zn-MOF-1** and **Co-MOF-2** before and after activation, respectively.

**Fig. S6** (a) and (b) PXRD spectra of **Zn-MOF-1** and **Co-MOF-2** before and after activation, respectively.

**Fig. S7** Calculation of detection limit of **Zn-MOF-1** toward  $\text{Al}^{3+}$ .

**Fig. S8** PXRD spectra of **Zn-MOF-1** after soaking in EtOH solution of  $\text{Al}^{3+}$  for three days.

**Fig. S9** XPS spectra of **Zn-MOF-1** before and after treatment in EtOH solution of  $\text{Al}^{3+}$ .

**Fig. S10** UV-vis spectra of **Zn-MOF-1** soaked in EtOH solution of  $\text{Al}^{3+}$  ions ( $10^{-3}$  M).

**Fig. S11** UV-vis spectra of **Zn-MOF-1** soaked in different concentration of  $\text{Al}^{3+}$  ions ( $10^{-3}$  M).

**Fig. S12** (a) The fluorescence spectra of **Zn-MOF-1** before and after activation. (b) The fluorescence titration result of the activated **Zn-MOF-1'** toward  $\text{Al}^{3+}$ . Insert: S-V plot.

**Fig. S13** (a) and (b) CO<sub>2</sub> adsorption isotherms for **Zn-MOF-1** and **Co-MOF-2** with fitting by Virial 2 model.

**Fig. S14** (a) and (b) The PXRD of **Zn-MOF-1** and **Co-MOF-2** before and after the cyclic experiment.

**Fig. S15** (a) and (b) FT-IR of **Zn-MOF-1** and **Co-MOF-2** after cyclic experiment.

### **X-ray crystallographic study**

Single-crystal X-ray data for **Zn-MOF-1** and **Co-MOF-2** were collected on a Siemens Smart CCD diffractometer with graphite-monochromatic Mo K $\alpha$  radiation ( $\lambda = 0.71073 \text{ \AA}$ ) at 298 K. The raw data frames were integrated into SHELX-format reflection files and corrected using SAINT program. Absorption corrections based on multi-scan were obtained by the SADABS program. The structure was solved with direct methods (SHELXS) and refined with full-matrix least-squares technique using the SHELXL-2014/7 programs. Displacement parameters were refined anisotropically, and the positions of the H-atoms were generated geometrically, assigned isotropic thermal parameters, and allowed to ride on their parent carbon atoms before the final cycle of refinement. PLATON/SQUEEZE was employed to calculate the contribution to the diffraction in the channels and produced a set of solvent-free diffraction intensities. The final formula was calculated from the SQUEEZE (A. L. Spek, J. Appl. Crystallogr. 2003, 36, 7) results combined with elemental analysis data and TGA data. Basic information pertaining to crystal parameters and structure refinement is summarized in Table S1. Selected bond lengths and angles are listed in Table S2.

**Table S1.** Refined crystal parameters of **Zn-MOF-1** and **Co-MOF-2**.

| Compound                                          | Zn-MOF-1                                                        | Co-MOF-2                                                        |
|---------------------------------------------------|-----------------------------------------------------------------|-----------------------------------------------------------------|
| CCDC                                              | 2301443                                                         | 2301442                                                         |
| Formula                                           | C <sub>31</sub> H <sub>29</sub> ZnN <sub>3</sub> O <sub>8</sub> | C <sub>31</sub> H <sub>29</sub> CoN <sub>3</sub> O <sub>8</sub> |
| Formula weight                                    | 637.19                                                          | 630.71                                                          |
| <i>T</i> [K]                                      | 298.15(2)                                                       | 298.15(2)                                                       |
| Crystal system                                    | Orthorhombic                                                    | Orthorhombic                                                    |
| Space group                                       | <i>P</i> 2 <sub>1</sub> 2 <sub>1</sub> 2                        | <i>P</i> 2 <sub>1</sub> 2 <sub>1</sub> 2                        |
| <i>a</i> [Å]                                      | 13.6458(13)                                                     | 13.6420(12)                                                     |
| <i>b</i> [Å]                                      | 21.7476(19)                                                     | 21.8159(17)                                                     |
| <i>c</i> [Å]                                      | 10.1293(9)                                                      | 10.0776(9)                                                      |
| $\alpha$ [°]                                      | 90                                                              | 90                                                              |
| $\beta$ [°]                                       | 90                                                              | 90                                                              |
| $\gamma$ [°]                                      | 90                                                              | 90                                                              |
| <i>V</i> [Å <sup>3</sup> ]                        | 3006.0(5)                                                       | 2999.2(4)                                                       |
| <i>Z</i>                                          | 4                                                               | 4                                                               |
| <i>D</i> <sub>calcd.</sub> [g·cm <sup>-3</sup> ]  | 1.407                                                           | 1.396                                                           |
| $\mu$ [mm <sup>-1</sup> ]                         | 0.872                                                           | 0.627                                                           |
| $\theta$ range                                    | 2.40-25.02                                                      | 2.39-25.02                                                      |
|                                                   | -16 ≤ <i>h</i> ≤ 8                                              | -16 ≤ <i>h</i> ≤ 15                                             |
| index ranges                                      | -25 ≤ <i>k</i> ≤ 25                                             | -20 ≤ <i>k</i> ≤ 25                                             |
|                                                   | -11 ≤ <i>l</i> ≤ 12                                             | -10 ≤ <i>l</i> ≤ 11                                             |
| R1; wR <sub>2a</sub> [ <i>I</i> > 2σ( <i>I</i> )] | 0.0367; 0.0624                                                  | 0.0324; 0.0633                                                  |
| GOF                                               | 0.981                                                           | 1.054                                                           |

$${}^a R_1 = \sum |F_o| - |F_c| / \sum |F_o|, {}^b wR_2 = [\sum w(F_o^2 - F_c^2)^2 / \sum w(F_o^2)^2]^{1/2}$$

**Table S2.** Selected bond lengths [Å] and angles [°] for **Zn-MOF-1** and **Co-MOF-2**.

| <b>Zn-MOF-1</b> |            |                 |            |
|-----------------|------------|-----------------|------------|
| Zn(1)-O(4)      | 1.973(3)   | Zn(1)-O(6)      | 1.988(3)   |
| Zn(1)-N(1)      | 2.051(3)   | Zn(1)-N(2)      | 2.037(3)   |
| O(4)-Zn(1)-O(6) | 98.30(11)  | O(4)-Zn(1)-N(1) | 111.50(15) |
| O(4)-Zn(1)-N(2) | 112.42(15) | N(2)-Zn(1)-N(1) | 111.69(14) |
| O(6)-Zn(1)-N(1) | 114.71(14) | O(6)-Zn(1)-N(2) | 107.53(14) |
| <b>Co-MOF-2</b> |            |                 |            |
| Co(1)-O(4)      | 1.988(3)   | Co(1)-O(6)      | 1.985(3)   |
| Co(1)-N(1)      | 2.046(3)   | Co(1)-N(2)      | 2.060(4)   |
| O(4)-Co(1)-O(6) | 96.02(12)  | O(4)-Co(1)-N(1) | 107.88(15) |
| O(4)-Co(1)-N(2) | 115.58(15) | N(2)-Co(1)-N(1) | 111.70(15) |
| O(6)-Co(1)-N(1) | 112.01(15) | O(6)-Co(1)-N(2) | 112.69(15) |

**Table S3.** Time tracing of **Zn-MOF-1** catalyzed CO<sub>2</sub> cycloaddition of epoxide.

| Entry | Substrate (10mmol)                                                                  | Catalyst | Co-Cat.<br>TBAB | T<br>°C | P<br>MPa | t<br>h | Yield<br>% |
|-------|-------------------------------------------------------------------------------------|----------|-----------------|---------|----------|--------|------------|
| 1     | 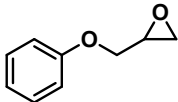 | 14mg     | 64.4mg          | 70      | 0.5      | 3      | 22         |
| 2     |  | 14mg     | 64.4mg          | 70      | 0.5      | 6      | 57         |
| 3     |  | 14mg     | 64.4mg          | 70      | 0.5      | 9      | 88         |
| 4     |  | 14mg     | 64.4mg          | 70      | 0.5      | 12     | 96         |
| 5     |  | 14mg     | 64.4mg          | 70      | 0.5      | 14     | 98         |

**Table S4.** Pressure tracing of **Zn-MOF-1** catalyzed CO<sub>2</sub> cycloaddition of epoxide.

| Entry | Substrate | Catalyst | Co-Cat. | T | P | t | Yield |
|-------|-----------|----------|---------|---|---|---|-------|
|-------|-----------|----------|---------|---|---|---|-------|

|   | 10mmol                                                                            |       | TBAB   | °C | MPa | h  | %  |
|---|-----------------------------------------------------------------------------------|-------|--------|----|-----|----|----|
| 1 | 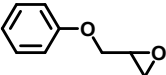 | 1\4mg | 64.4mg | 70 | 0.1 | 12 | 15 |
| 2 |  | 1\4mg | 64.4mg | 70 | 0.3 | 12 | 61 |
| 3 |  | 1\4mg | 64.4mg | 70 | 0.5 | 12 | 96 |
| 4 |  | 1\4mg | 64.4mg | 70 | 0.7 | 12 | 97 |
| 5 |  | 1\4mg | 64.4mg | 70 | 1   | 12 | 99 |

**Table S5.** CO<sub>2</sub> cycloaddition of different epoxides catalyzed by **Zn-MOF-1** and **Co-MOF-2**.

| Entry | Substrate 10mmol                                                                    | Catalyst       | Co-Cat. |    | T   | P  | t  | Yield% |   |
|-------|-------------------------------------------------------------------------------------|----------------|---------|----|-----|----|----|--------|---|
|       |                                                                                     |                | TBAB    | °C |     |    |    | MPa    | h |
| 1     | 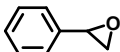 | 1\4mg<br>2\4mg | 64.4mg  | 70 | 0.5 | 12 | 65 | 53     |   |
| 2     |  | 1\4mg<br>2\4mg | 64.4mg  | 70 | 0.5 | 12 | 87 | 77     |   |
| 3     |  | 1\4mg<br>2\4mg | 64.4mg  | 70 | 0.5 | 12 | 80 | 72     |   |
| 4     |  | 1\4mg<br>2\4mg | 64.4mg  | 70 | 0.5 | 12 | 83 | 79     |   |
| 5     |  | 1\4mg<br>2\4mg | 64.4mg  | 70 | 0.5 | 12 | 96 | 92     |   |

**Table S6.** Investigation of some substrates in the CO<sub>2</sub>-to-epoxide cycloaddition reaction (substrate in entry 4 and 5 in Table 1) catalyzed by Zn(NO<sub>3</sub>)<sub>2</sub>·6H<sub>2</sub>O and

Co(NO<sub>3</sub>)<sub>2</sub>·6H<sub>2</sub>O in the presence of TBAB as the cocatalyst.

| Entry | catalyst                                             | Substrate                                                                         | Product                                                                            | Yield% |
|-------|------------------------------------------------------|-----------------------------------------------------------------------------------|------------------------------------------------------------------------------------|--------|
| 1     | Zn(NO <sub>3</sub> ) <sub>2</sub> ·6H <sub>2</sub> O | 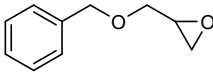 |  | 65     |
| 2     | Zn(NO <sub>3</sub> ) <sub>2</sub> ·6H <sub>2</sub> O |  |  | 79     |
| 3     | Co(NO <sub>3</sub> ) <sub>2</sub> ·6H <sub>2</sub> O |  |  | 47     |
| 4     | Co(NO <sub>3</sub> ) <sub>2</sub> ·6H <sub>2</sub> O |  |  | 73     |

Reaction conditions: epoxide (10 mmol), catalyst (0.1 mol %), and TBAB (0.2 mmol) under CO<sub>2</sub> (0.5 MPa), 70 °C, 12 h.

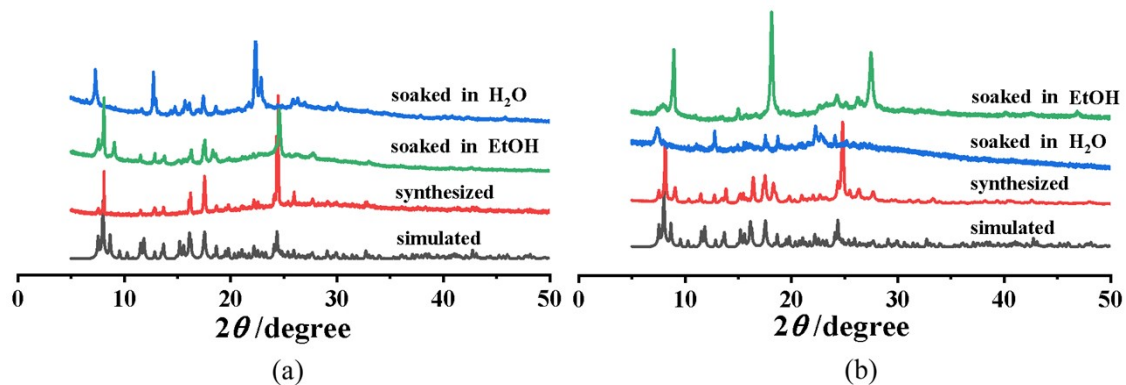

**Fig. S1** (a) and (b) PXRD spectra of **Zn-MOF-1** and **Co-MOF-2** soaked in EtOH and H<sub>2</sub>O.

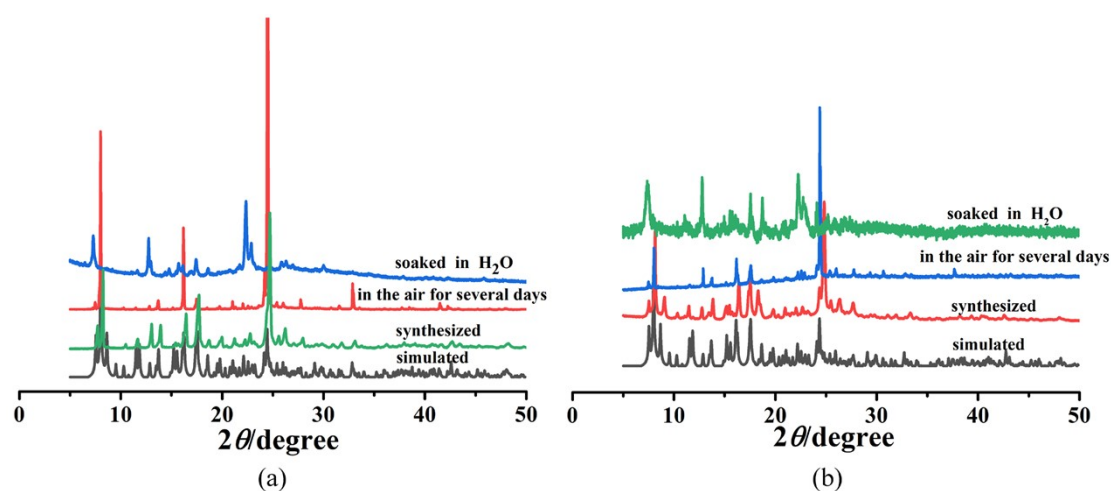

**Fig. S2** (a) and (b) PXRD spectra of **Zn-MOF-1** and **Co-MOF-2**: Newly-synthesized samples, exposed in air for five days, immersed in water for three days.

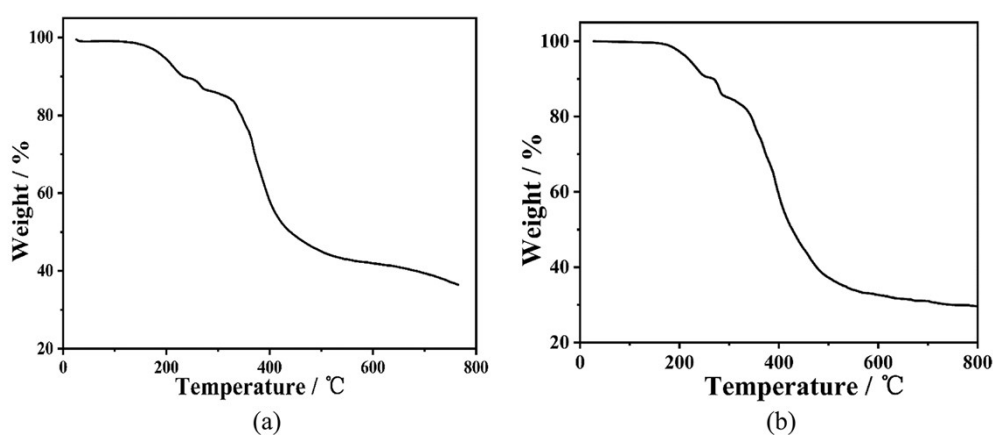

**Fig. S3.** (a) and (b) TG of **Zn-MOF-1** and **Co-MOF-2**, respectively.



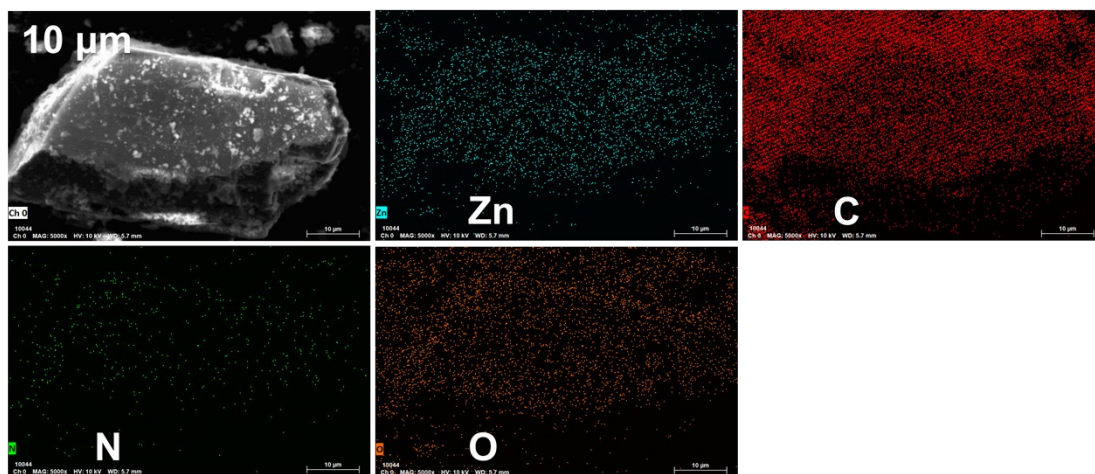

(a)

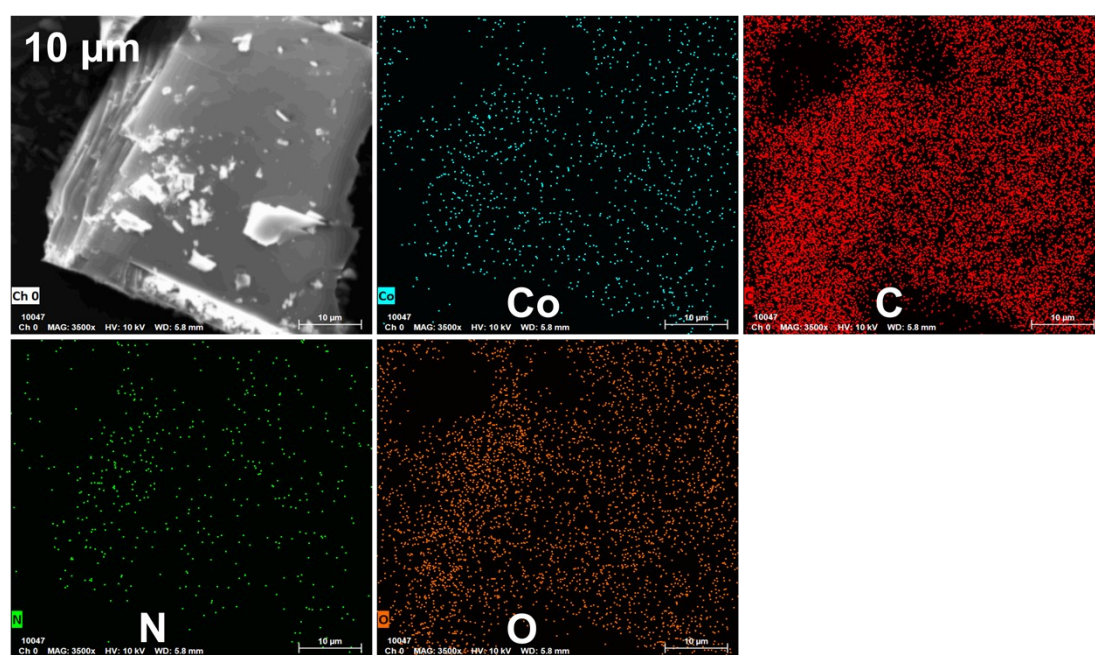

(b)

**Fig. S4** (a) and (b) EDS mapping of Zn-MOF-1 and Co-MOF-2.

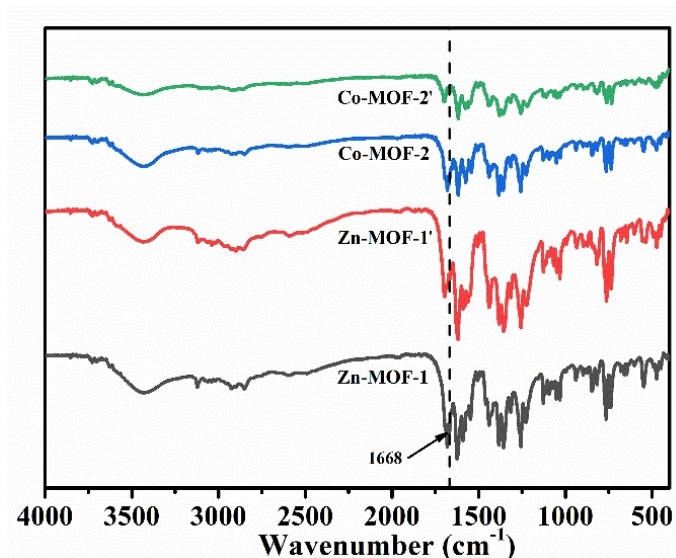

**Fig. S5** (a) and (b) IR of Zn-MOF-1 and Co-MOF-2 before and after activation, respectively.

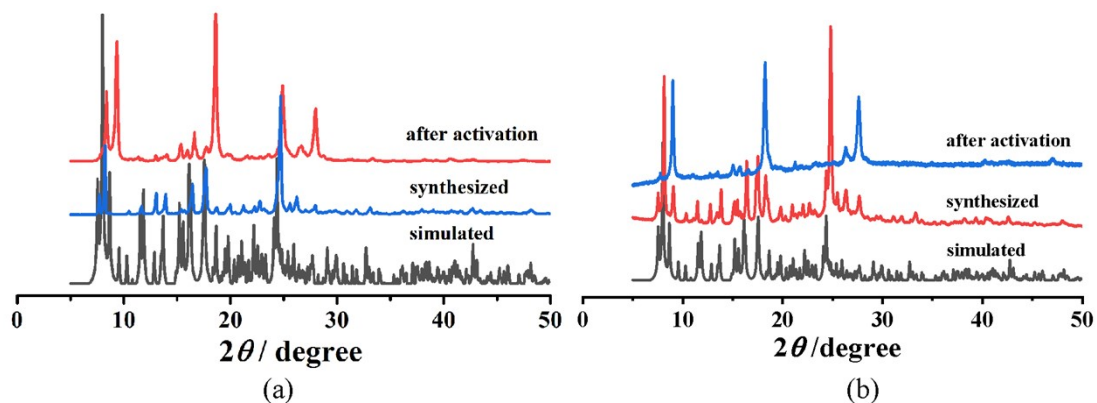

**Fig. S6** (a) and (b) PXRD spectra of Zn-MOF-1 and Co-MOF-2 before and after activation, respectively.

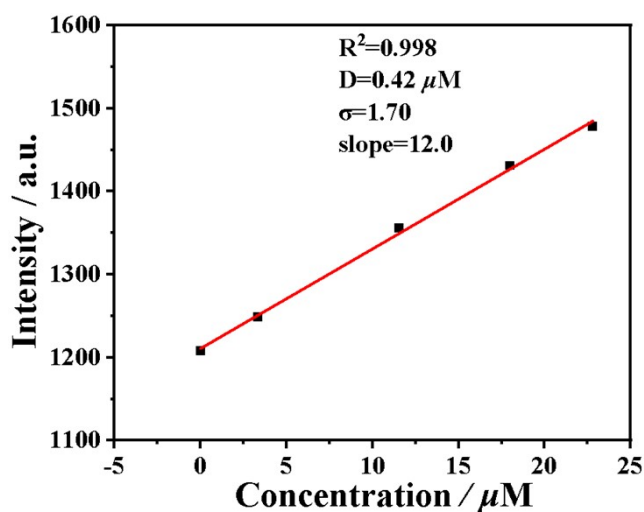

**Fig. S7** Calculation of detection limit of Zn-MOF-1 toward  $\text{Al}^{3+}$ .

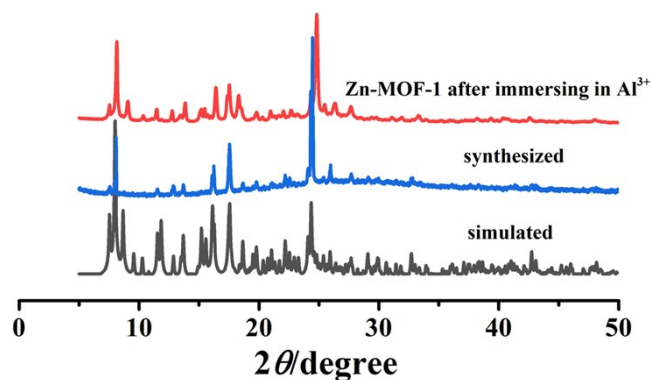

**Fig. S8** PXR D spectra of Zn-MOF-1 after soaking in EtOH solution of  $\text{Al}^{3+}$  for three days.

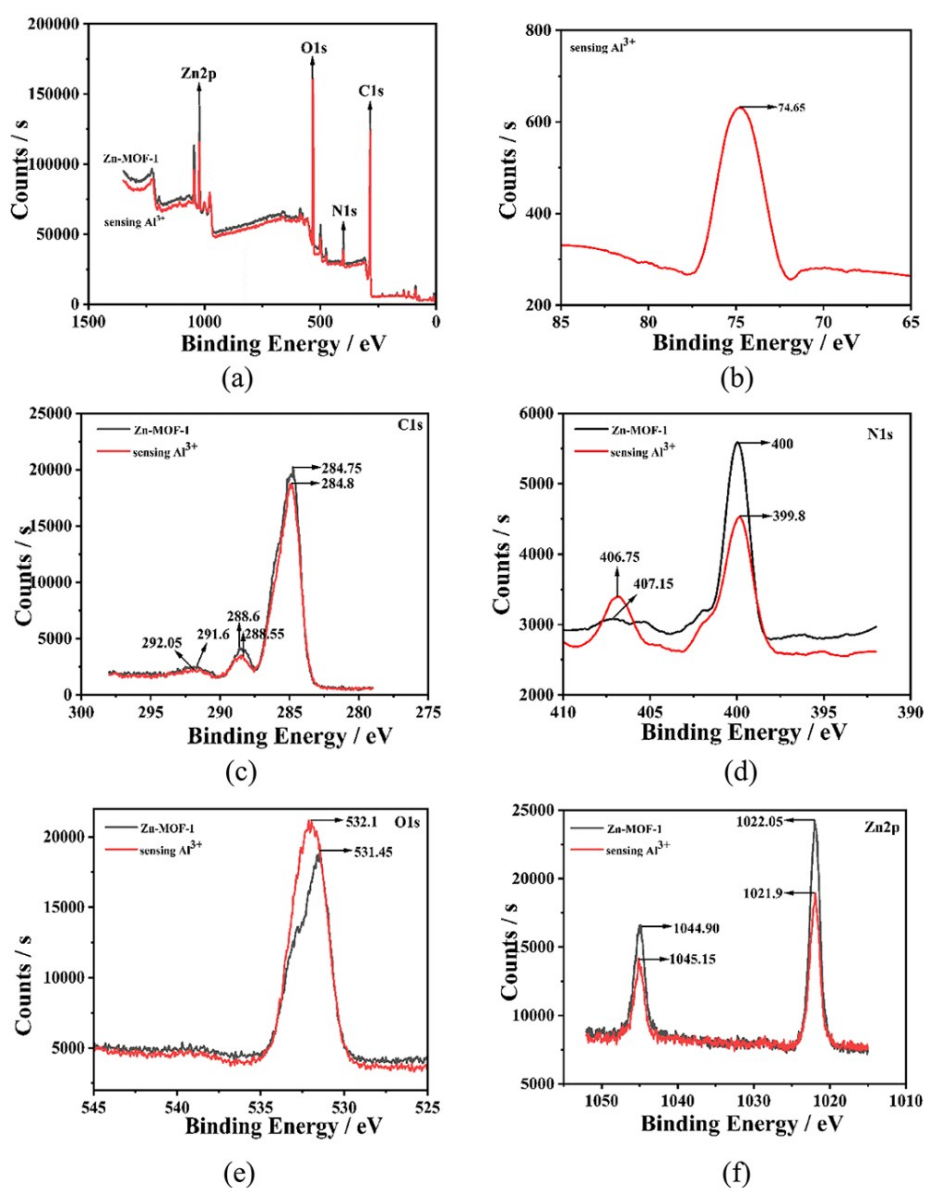

**Fig. S9** XPS spectra of Zn-MOF-1 before and after treatment in EtOH solution of  $\text{Al}^{3+}$ .

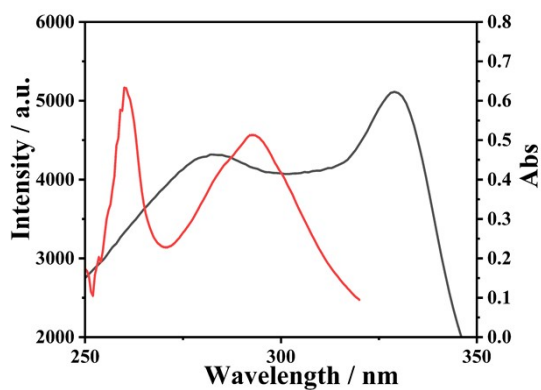

**Fig. S10** UV-vis spectra of **Zn-MOF-1** soaked in EtOH solution of  $\text{Al}^{3+}$  ions ( $10^{-3}$  M).

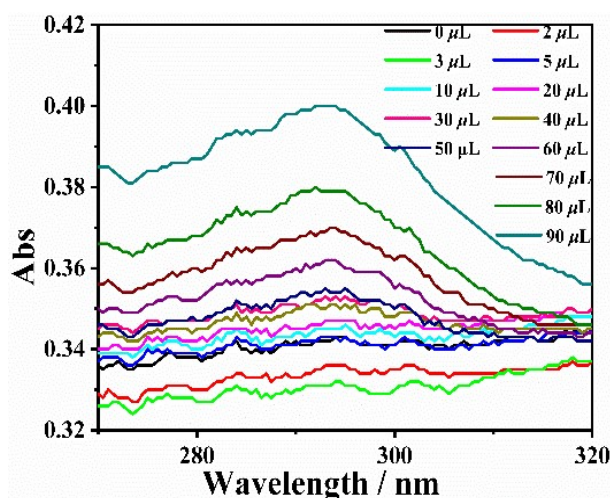

**Fig. S11** UV-vis spectra of **Zn-MOF-1** soaked in different concentration of  $\text{Al}^{3+}$  ions ( $10^{-3}$  M).

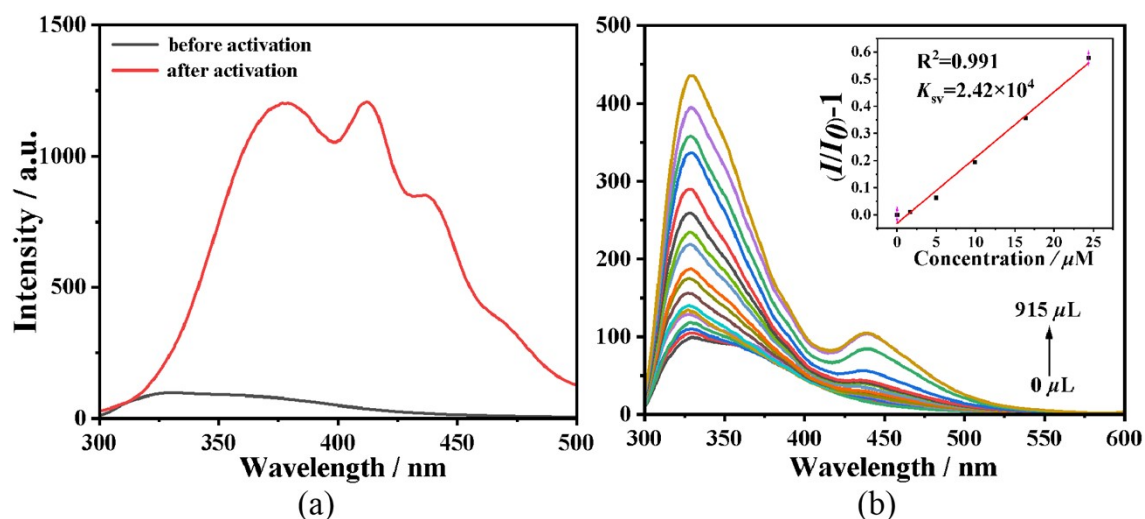

**Fig. S12** (a) The fluorescence spectra of **Zn-MOF-1** before and after activation. (b) The fluorescence titration result of the activated **Zn-MOF-1'** toward  $\text{Al}^{3+}$ . Insert: S-V plot.

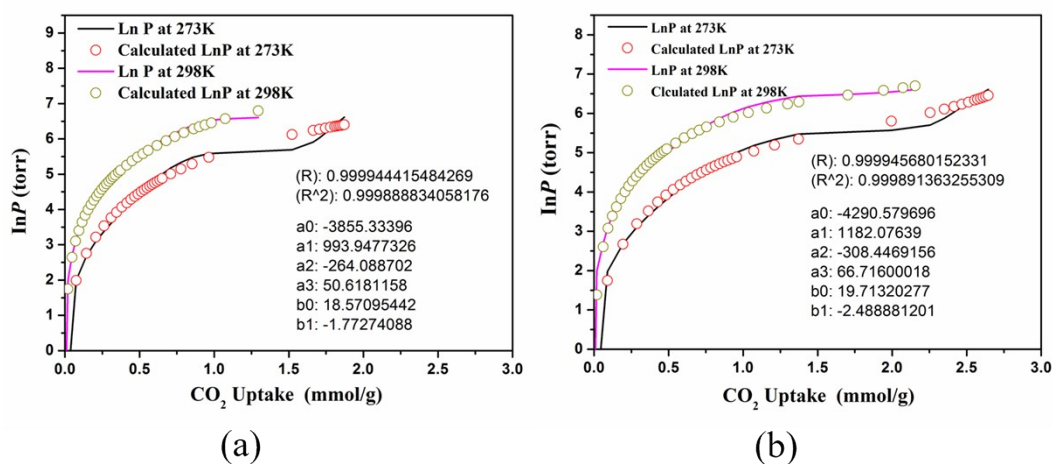

**Fig. S13** (a) and (b) CO<sub>2</sub> adsorption isotherms for **Zn-MOF-1** and **Co-MOF-2** with fitting by Virial 2 model.

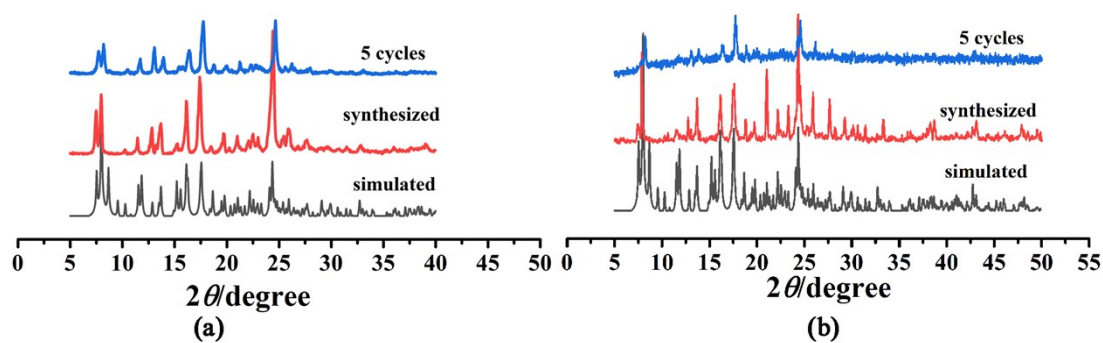

**Fig. S14** (a) and (b) The PXRD of **Zn-MOF-1** and **Co-MOF-2** before and after the cyclic experiment.

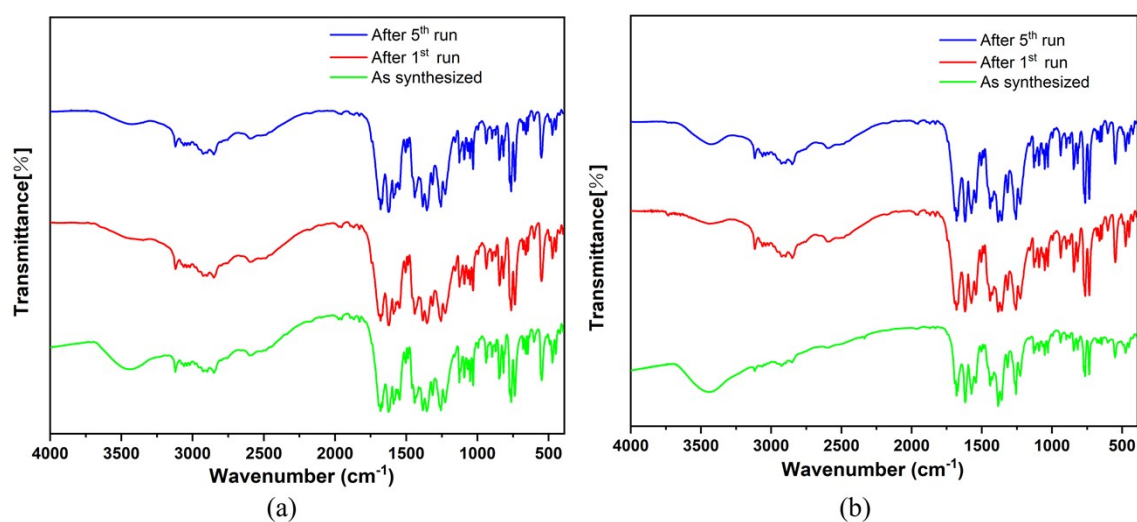

**Fig. S15** (a) and (b) FT-IR of **Zn-MOF-1** and **Co-MOF-2** after cyclic experiment.
